# Supplementary material for: Homoeologous Recombination of the V1r1-V1r2 Gene Cluster of Pheromone Receptors in an Allotetraploid Lineage of Teleosts
Source: MDPI journal article supplement (doi:10.3390/genes8110334), 2017-11-21
Supplement: s1 [file s1]

## Supplementary Materials

### 1. PCR conditions:

#### 1.1. For cytochrome *b*:

After one step of 95 °C for 5 min, 35 successive cycles of 94 °C for 30 sec, 54 °C for 30 sec, and 72 °C for 45 sec.

#### 1.2. For *RAGI*:

After one step of 95°C for 5 min, 30 successive cycles of 94 °C for 45 sec, 49 °C for 45 sec, and 72 °C for 1 min.

#### 1.3. For *Vlr1-Vlr2* cluster:

After one step of 95°C for 5 min, 30 successive cycles of 94 °C for 45 sec, 48 °C for 45 sec, and 72 °C for 3 min.

### 2. PCR primer pairs:

#### 2.1. For cytochrome *b*

cytb-F: GACTTGAAGAACCACCGTTGTTATTCAAC

cytb-R: GCGCTAGGGAGGAATTTAACCTCC

#### 2.2. For *RAGI* [1]

RAG-1F: AGCTGTAGTCAGTAYCACAARATG

RAG-RV1: TCCTGRAAGATYTTGTAGAA

#### 2.3. For a partial segment of *Vlr1-Vlr2* cluster:

aV1r1R: GTBAGVGTRTABACCCAVAGBCC (designed based on pre-existing *V1r1* sequences of *Danio rerio*, *Gasterosteus aculeatus* and *Oryzias latipes*)

aV1r2R: CGCTTTCACCTTCCTGTTGGAGGAGATGAT [2]

2.4. For *V1r1-V1r2* cluster (containing complete CDSs of *V1r1* and *V1r2*)

fV1r1: GTGTTTTAGTTCAAGATAAGCTGTG

fV1r2: CCCAATTACAACCTCTTTCCTGAG

- [1] Slechtova, V., Bohlen, J. and Perdices, A. (2008). Molecular phylogeny of the freshwater fish family Cobitidae (Cypriniformes : Teleostei): Delimitation of genera, mitochondrial introgression and evolution of sexual dimorphism. *Molecular Phylogenetics And Evolution* 47, 812-831.
- [2] Pfister, P. and Rodriguez, I. (2005). Olfactory expression of a single and highly variable V1r pheromone receptor-like gene in fish species. *Proceedings Of the National Academy Of Sciences Of the United States Of America* 102, 5489-5494.

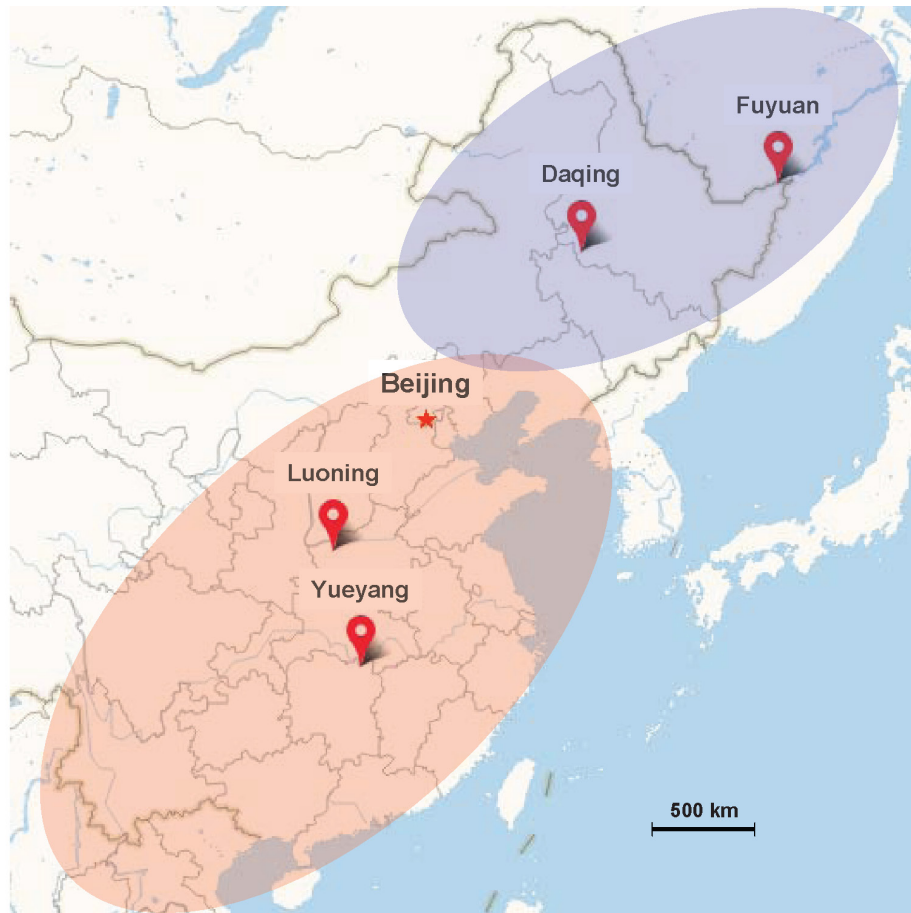

**Figure S1 – Sampling sites on a map.**

The general distribution range of *Misgurnus anguillicaudatus* is shaded in orange and that of *M. bipartitus* in purple, by simplification. Populations of *Paramisgurnus dabryanus* live in all these areas. In this study, diploids of *M. anguillicaudatus* were collected in Yueyang, tetraploids of *M. anguillicaudatus* in Luoning, samples of *M. bipartitus* in Daqing and samples of *Paramisgurnus dabryanus* in Fuyuan.

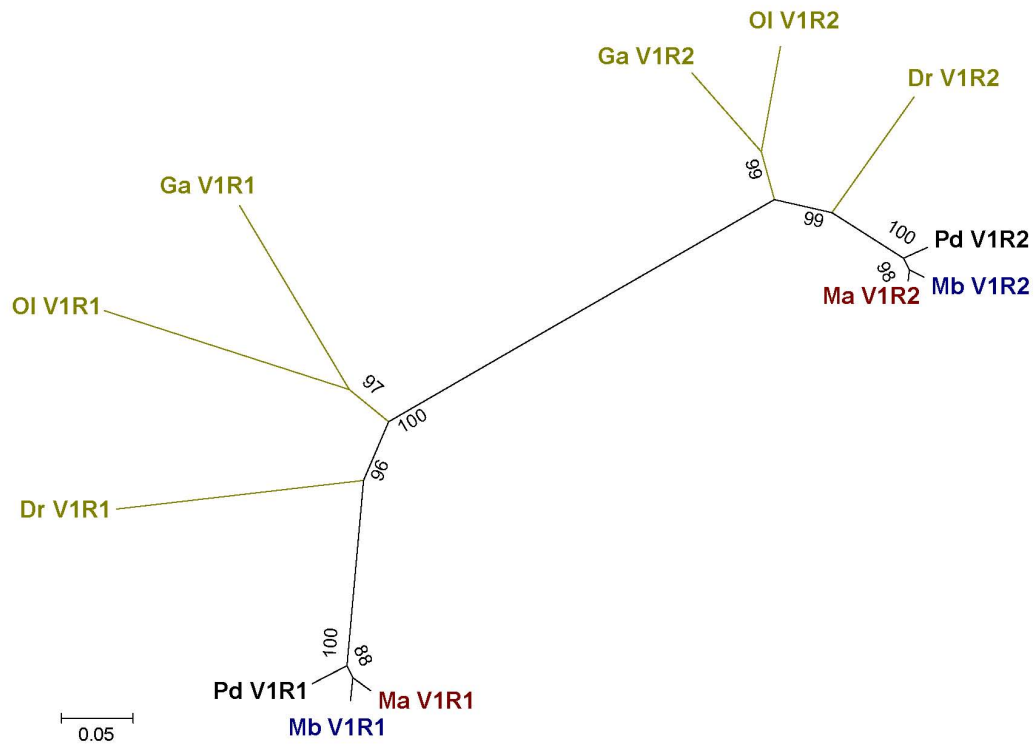

**Figure S2 – Unrooted phylogenetic tree of V1R1 and V1R2 protein of *M. anguillicaudatus* (diploid), *M. bipartitus*, *Paramisgurnus dabryanus* and three model fishes.**

This phylogenetic tree was constructed by Neighbour-Joining (NJ) method using p-distance. Statistical support values (percentage) for nodes were calculated with 1000 bootstrap replicates. Abbreviations: Dr, *Danio rerio*; Ga, *Gasterosteus aculeatus*; Ol, *Oryzias latipes*; Ma, *M. anguillicaudatus*; Mb, *M. bipartitus*; Pb, *P. dabryanus*.

**Table S1 – Models for phylogenetic construction of different sets of sequences.**

| Gene         | Model selected by MEGA7 | Model used in ML | Model used in MrBayes     |
|--------------|-------------------------|------------------|---------------------------|
| <i>Cyt b</i> | HKY+G                   | HKY+G            | HKY+G (nst=2 rates=gamma) |
| <i>RAG1</i>  | K2+G                    | K2+G             | HKY+G (nst=2 rates=gamma) |
| <i>Vlr1</i>  | K2+G                    | K2+G             | HKY+G (nst=2 rates=gamma) |
| <i>Vlr2</i>  | T92+G                   | T92+G            | HKY+G (nst=2 rates=gamma) |

Abbreviations: HKY: Hasegawa-Kishino-Yano; T92: Tamura 3-parameter; K2: Kimura 2-parameter.

**Table S2 – Results of HKA test.**

|                                       | Comparison 1 |                             | Comparison 2 |             | Comparison 3 |             | Comparison 4 |                      |
|---------------------------------------|--------------|-----------------------------|--------------|-------------|--------------|-------------|--------------|----------------------|
|                                       | RAG-1        | <i>Vlr1-Vlr2</i><br>cluster | RAG-1        | <i>Vlr1</i> | RAG-1        | <i>Vlr2</i> | RAG-1        | Intergenic<br>region |
| <b>Intraspecific<br/>Ploymorphism</b> |              |                             |              |             |              |             |              |                      |
| Segregating Sites<br>(observation)    | 42           | 97                          | 42           | 24          | 42           | 28          | 42           | 14                   |
| Segregating Sites<br>(expectation)    | 28.71        | 110.29                      | 32.20        | 33.80       | 37.01        | 32.99       | 23.26        | 32.74                |
| Total Number of<br>Sites              | 903          | 3361                        | 903          | 969         | 903          | 954         | 903          | 1412                 |
| Sample Size                           | 24           | 24                          | 24           | 24          | 24           | 24          | 24           | 24                   |
| <b>Interspecific<br/>Divergence</b>   |              |                             |              |             |              |             |              |                      |
| No. Differences<br>(observation)      | 26.75        | 167.11                      | 26.75        | 48.18       | 26.75        | 33.29       | 26.75        | 82.75                |
| No. Difference<br>(expectation)       | 40.04        | 153.82                      | 36.55        | 38.38       | 31.74        | 28.29       | 45.49        | 64.01                |
| Total Number of<br>Sites              | 903          | 3361                        | 903          | 969         | 903          | 954         | 903          | 1412                 |
| chi-square test<br>Value              | 3.502        |                             | 2.883        |             | 0.712        |             | 13.018       |                      |
| P-value                               | 0.0613       |                             | 0.0895       |             | 0.3989       |             | 0.0003       |                      |

**Alignment of the *Vlr1-Vlr2* clusters of samples** is provided as an independent file.

**Summary of the recombination analysis by RDP4** is provided as an independent file.
